# Supplementary material for: A Pyridine Diketopyrrolopyrrole-Grafted Graphene Oxide Nanocomposite for the Sensitive Detection of Chloramphenicol by a Direct Electrochemical Method
Source: MDPI journal article supplement (doi:10.3390/nano13030392), 2023-01-18
Supplement: s1 [file s1]

# **A Pyridine Diketopyrrolopyrrole-Grafted Graphene Oxide Nanocomposite for the Sensitive Detection of Chloramphenicol by a Direct Electrochemical Method**

## **Synthesis of PDPP**

Sodium metal (0.8 g) was added to tert-amyl alcohol (30.0 ml) and dissolved completely in 115°C to form the sodium tert-amylate solution. To this solution, 3-cyanopyridine (0.2 g) was added slowly, followed by the solution of diethyl succinate (0.2 g) in tert-amyl alcohol (10.0 ml) drop by drop. After reaction under 115 °C for 3 h more, methyl alcohol (80 ml) and concentrated HCl (5 ml) were added to give precipitate. The filter cake was washed by methyl alcohol (100 ml), H<sub>2</sub>O (100 ml) and methyl alcohol (100 ml) in sequence. Then the filter cake was suspended in dimethyl sulfoxide (20 ml) under heating of 100 °C for 48 hours. Again, the filter cake was washed by methyl alcohol (100 ml), H<sub>2</sub>O (100 ml) and methyl alcohol (100 ml) in sequence, and dried under 40 °C in vacuum for 4 hours to obtain the brown product with a yield of 80.1%.

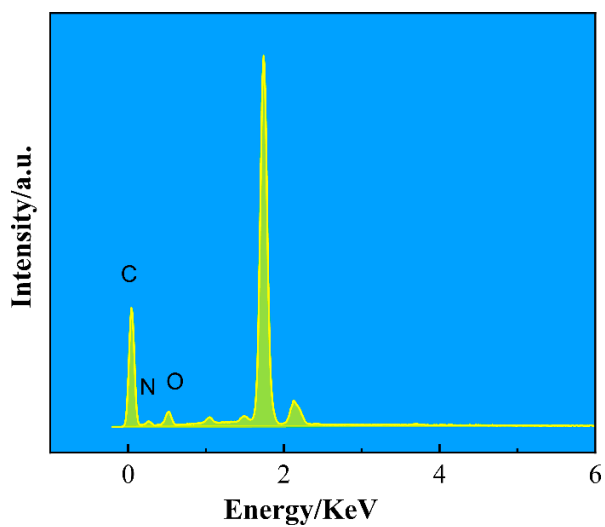

**Figure. S1** EDS spectrum of PDPP/GO.

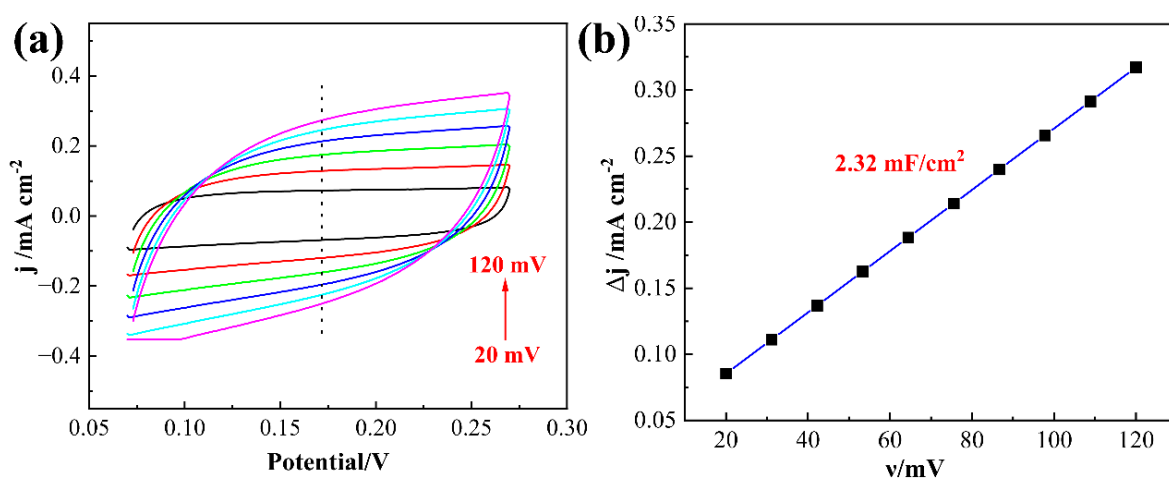

**Figure. S2** (a) The CV responses were measured at non-Faradaic region from 0.07 V to 0.27 V for PDPP/GO/GCE in 0.1 M PBS contained 0.01 mM CAP at various scan rates (20–120 mV/s). (b) Linear plot of  $\Delta j / 2$  at 0.17 V vs. scan rate.

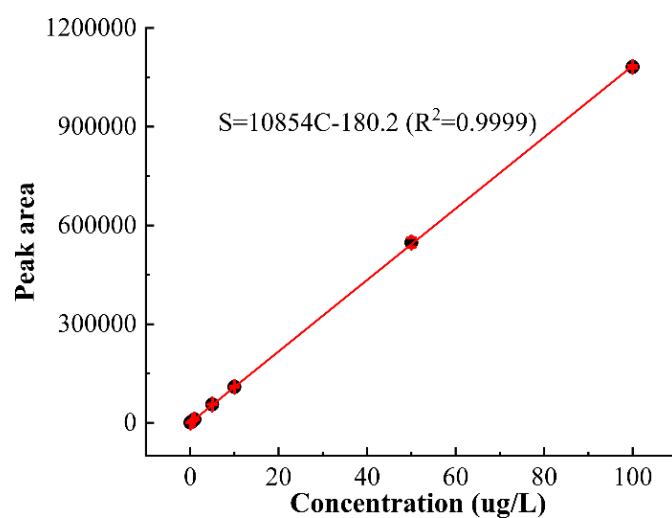

**Figure. S3** The calibration curve of low concentration range, CAP (0.1, 0.5, 1, 5, 10, 50, 100 ug/L).

**Table S1.** Determination of CAP in tap water sample by high performance liquid chromatography.

| sample       | Added<br>( $\mu\text{M}$ ) | Found<br>( $\mu\text{M}$ ) | Recovery<br>(%) | Average<br>value | RSD<br>(%) |
|--------------|----------------------------|----------------------------|-----------------|------------------|------------|
| Tap<br>water | 0.1                        | 0.1065                     | 106.5           | 107.5            | 1.28       |
|              | 0.1                        | 0.1070                     | 107.0           |                  |            |
|              | 0.1                        | 0.1091                     | 109.1           |                  |            |
